# Supplementary figures and images for: Risk factors for myocardial infarction in women and men: insights from the INTERHEART study
Source: Oxford University Press journal article supplement (doi:10.1093/eurheartj/ehn018), 2008-03-10

**Supplementary Figure 1: Mean age of first MI in women and men**

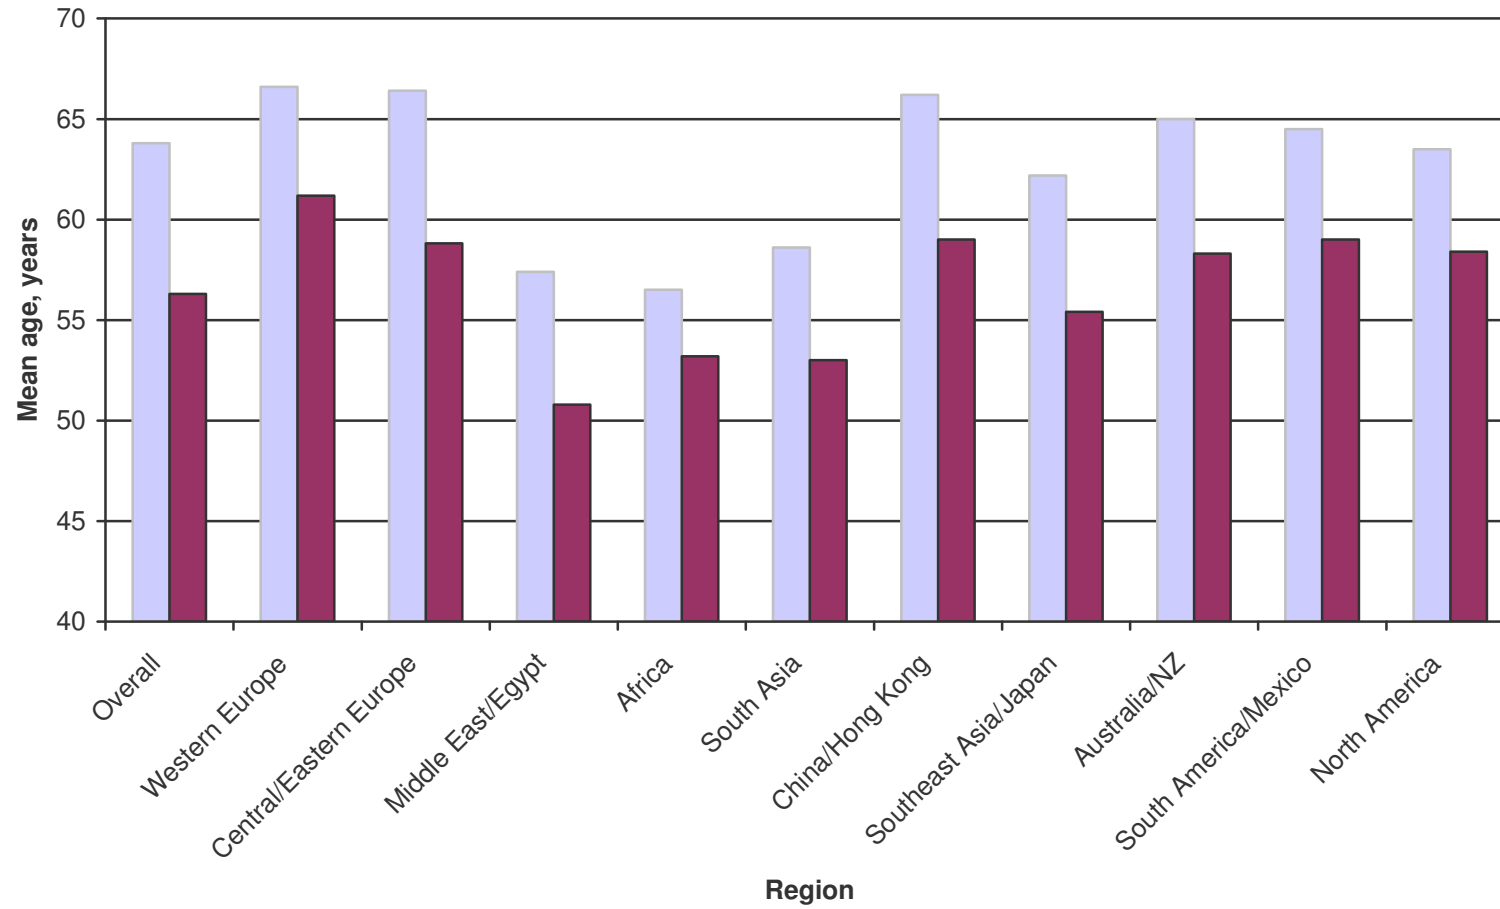

Legend:      Women ■      Men ■

Supplement: ehn018_Supplementary_Data.zip [file ehn018_Supplementary_Data.zip]
